# Supplementary material
Source: HighWire-hosted journal article supplement (https://www.cmajopen.ca/highwire/filestream/87614/field_highwire_adjunct_files/1/2021-0084-2-at.pdf)
Supplement: 2021-0084-2-at.pdf [file 2021-0084-2-at.pdf]

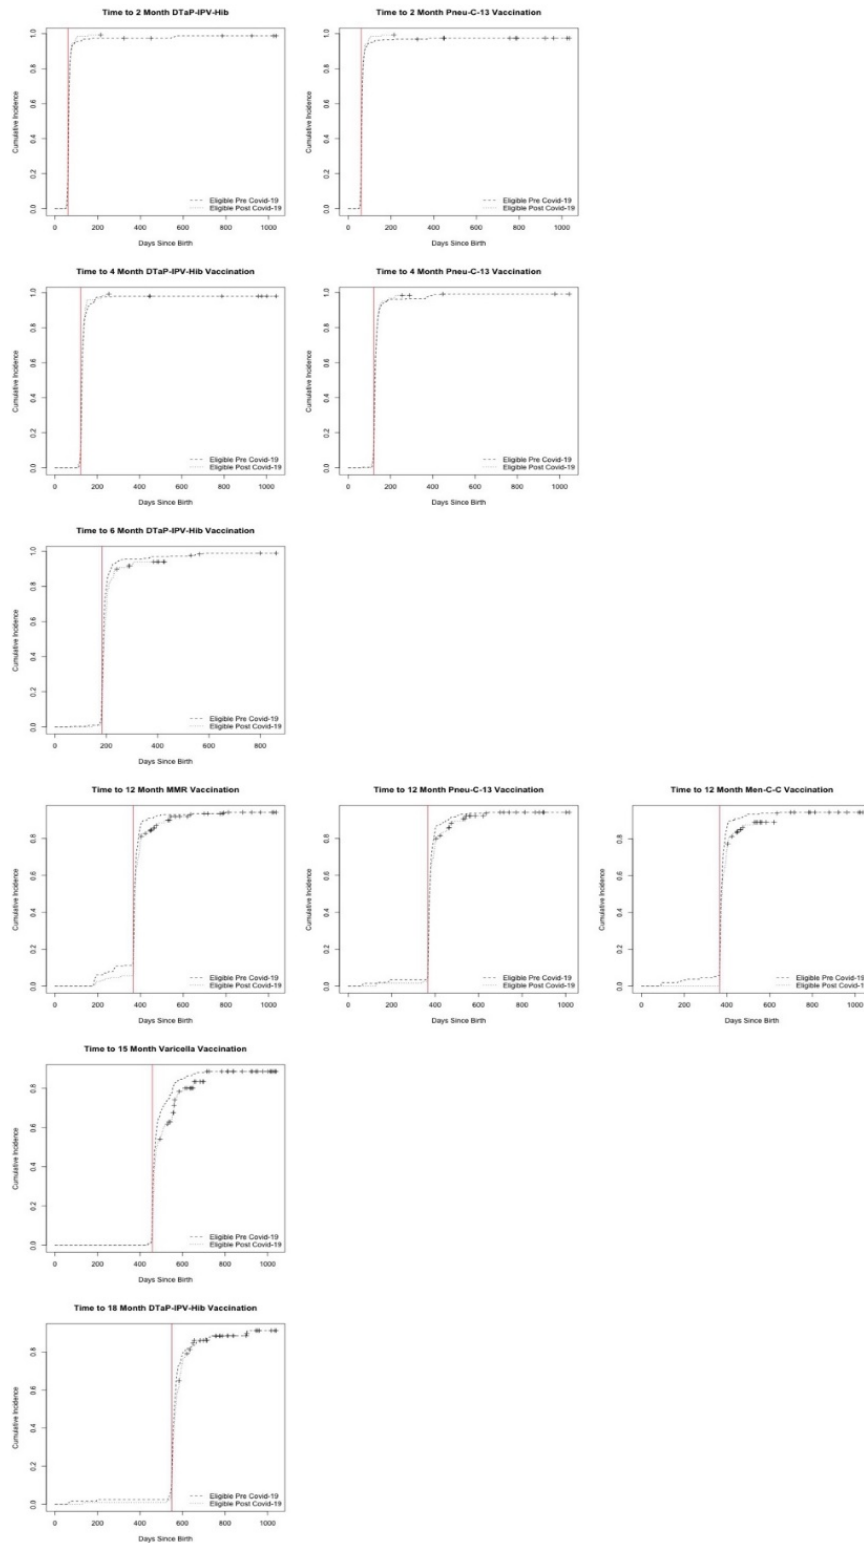

Figure 1: Cumulative incidence functions for each of the 10 routine childhood vaccinations, pre-vs-post COVID-19. The dashed line represents vaccinations scheduled to fall in the pre-COVID-19 period; whereas, the dotted line indicates vaccinations scheduled to fall in the post-COVID-19 period. A vertical red line depicts the scheduled timing of each of the routine childhood vaccinations. The sub-plots in each of the 6 rows correspond to the 2-, 4-, 6-, 12-, 15-, and 18-month routine childhood vaccinations, respectively.

Appendix 2, as supplied by the authors. Appendix to: Dong A, Meaney C, Sandhu G, et al. Routine childhood vaccination rates in an academic family health team before and during the first wave of the COVID-19 pandemic: a pre–post analysis of a retrospective chart review. *CMAJ Open* 2022. DOI:10.9778/cmajo.20210084. Copyright © 2022 The Author(s) or their employer(s). To receive this resource in an accessible format, please contact us at [cmajgroup@cmaj.ca](mailto:cmajgroup@cmaj.ca).
